# Supplementary material
Source: publisher figshare collection journal article supplement (https://tandf.figshare.com/ndownloader/files/13039265)
Supplement: Supplementary file 1 [file 13039265]

| Supplemental Table 1.   SNPs Entered in LASSO Regression | | | | | | | | | | | | |
| --- | --- | --- | --- | --- | --- | --- | --- | --- | --- | --- | --- | --- |
| Associated Function | Gene | SNPs | | | | | | | | | | |
| Executive Function | *AVPR1A* (4) | rs11174811 | rs3803107 | rs10219543 | | rs3021529 | |  | |  | |  |
|  |  |  |  |  | |  | |  | |  | |  |
| Executive Function | *CADM2* (95*)* | rs1248860 | rs4856554 | rs1248858 | | rs6768455 | | rs765461 | | rs2200472 | | rs6549009 |
|  |  | rs9814835 | rs7645952 | rs6790864 | | rs9820587 | | rs13061527 | | rs9875381 | | rs2171141 |
|  |  | rs17022545 | rs1452117 | rs1013839 | | rs986132 | | rs1452123 | | rs11926317 | | rs818217 |
|  |  | rs818222 | rs9811546 | rs9861237 | | rs2117152 | | rs9822731 | | rs7627971 | | rs1821349 |
|  |  | rs1465716 | rs2196096 | rs892365 | | rs2117153 | | rs9309982 | | rs2875907 | | rs6804845 |
|  |  | rs10511083 | rs10511079 | rs2326319 | | rs1375547 | | rs1375567 | | rs6794759 | | rs10511074 |
|  |  | rs11928368 | rs6779752 | rs9867437 | | rs9819476 | | rs9824301 | | rs9829032 | | rs9860249 |
|  |  | rs4507269 | rs4513466 | rs9810211 | | rs4355292 | | rs11127905 | | rs7629690 | | rs12494196 |
|  |  | rs9871618 | rs7612090 | rs9883807 | | rs6549051 | | rs7611991 | | rs1037231 | | rs7355953 |
|  |  | rs7620948 | rs3158 | rs1448610 | | rs7616936 | | rs2325035 | | rs7622475 | | rs6549055 |
|  |  | rs4555536 | rs9818122 | rs2122042 | | rs1003986 | | rs1375219 | | rs10511067 | | rs11915638 |
|  |  | rs13078807 | rs12495178 | rs4856279 | | rs7620825 | | rs1562626 | | rs7642281 | | rs4856606 |
|  |  | rs4302394 | rs9812103 | rs9861174 | | rs2324938 | | rs12486982 | | rs6549064 | | rs7619493 |
|  |  | rs9829960 | rs13061174 | rs9866277 | | rs9310001 | |  | |  | |  |
|  |  |  |  |  | |  | |  | |  | |  |
| Executive Function | *COMT* (5) | rs165656 | rs165722 | rs2239393 | | X500437 | | rs4680 | |  | |  |
|  |  |  |  |  | |  | |  | |  | |  |
| Executive Function | *DBH* (9) | rs3025382 | rs2519143 | rs3025388 | | rs2007153 | | rs2519155 | | rs1611123 | | rs2283124 |
|  |  | rs77905 | rs2097628 |  | |  | |  | |  | |  |
|  |  |  |  |  | |  | |  | |  | |  |
| Executive Function | *DRD2* (1) | rs2440390 |  |  | |  | |  | |  | |  |
|  |  |  |  |  | |  | |  | |  | |  |
| Executive Function | *MAOA* (0) | *No SNPs retained* | | |  | |  | |  | |  | |
|  |  |  |  |  | |  | |  | |  | |  |
| Executive Function | *SLC6A3* (13) | rs27072 | rs40184 | rs3776512 | | rs3776511 | | rs6347 | | rs27048 | | rs2042449 |
|  |  | rs464049 | rs460700 | rs460000 | | rs4975646 | | rs403636 | | rs2617605 | |  |
|  |  |  |  |  | |  | |  | |  | |  |
| Executive Function | *SLC6A4* (4) | rs1042173 | rs12449783 | rs3794808 | | rs4583306 | |  | |  | |  |
|  |  |  |  |  | |  | |  | |  | |  |
| Speech/Language | *ATP2C2* (79) | rs11648651 | rs4782936 | rs958577 | | rs13336802 | | rs16963542 | | rs12933433 | | rs12933274 |
|  |  | rs7205535 | rs2326253 | rs2326254 | | rs4782945 | | rs4782946 | | rs11863271 | | rs8048576 |
|  |  | rs7189221 | rs12448765 | rs11645513 | | rs9929758 | | rs9788948 | | rs922450 | | rs2061789 |
|  |  | rs1609478 | rs9935544 | rs16963588 | | rs8052881 | | rs247820 | | rs12102757 | | rs247811 |
|  |  | rs17814267 | rs11149652 | rs17741422 | | rs12446219 | | rs3826145 | | rs247808 | | rs12149164 |
|  |  | rs11643072 | rs12922606 | rs247813 | | rs8053211 | | rs17741623 | | rs247804 | | rs8051403 |
|  |  | rs247805 | rs8063973 | rs8059665 | | rs962877 | | rs962878 | | rs247842 | | rs12934526 |
|  |  | rs4782624 | rs4782962 | rs442134 | | rs2914819 | | rs2061788 | | rs429790 | | rs373950 |
|  |  | rs4782626 | rs4782966 | rs2303852 | | rs11640901 | | rs2288581 | | rs2288578 | | rs247896 |
|  |  | rs12445933 | rs247893 | rs16973814 | | rs247892 | | rs2278299 | | rs247888 | | rs3826149 |
|  |  | rs12149888 | rs247884 | rs171577 | | rs747718 | | rs4782969 | | rs919422 | | rs416236 |
|  |  | rs416330 | rs2241634 |  | |  | |  | |  | |  |
|  |  |  |  |  | |  | |  | |  | |  |
| Speech/Language | *FOXP2* (44) | rs1868757 | rs13243235 | rs12532000 | | rs10500038 | | rs4730626 | | rs12154502 | | rs717233 |
|  |  | rs12535428 | rs1668335 | rs1728431 | | rs1450832 | | rs11771168 | | rs1209254 | | rs12537074 |
|  |  | rs1916988 | rs1916977 | rs1358278 | | rs2694937 | | rs2140615 | | rs1916986 | | rs2690833 |
|  |  | rs12705959 | rs2140619 | rs940468 | | rs11505922 | | rs2396724 | | rs2894699 | | rs10255943 |
|  |  | rs10486026 | rs10262103 | rs727644 | | rs4727799 | | rs17312686 | | rs2106900 | | rs10279936 |
|  |  | rs10486023 | rs7784315 | rs7799109 | | rs17137135 | | rs1229761 | | rs1229758 | | rs10085693 |
|  |  | rs6953053 | rs12705966 |  | |  | |  | |  | |  |
|  |  |  |  |  | |  | |  | |  | |  |
| Speech/Language | *ROBO1* (16) | rs6786778 | rs723766 | rs723765 | | rs1027828 | | rs3773195 | | rs2872006 | | rs1027832 |
|  |  | rs3773201 | rs17016413 | rs10865569 | | rs3773207 | | rs7625555 | | rs6809232 | | rs2660739 |
|  |  | rs998146 | rs7613490 |  | |  | |  | |  | |  |
